# Supplementary material
Source: PubMed Central journal article supplement (PMC2872994)
Supplement: NIHMS196205-supplement-1_si_001.pdf [file NIHMS196205-supplement-1_si_001.pdf]

# Effects of the Nature and Concentration of Salt on the Interaction of the HIV-1 Nucleocapsid Protein with SL3 RNA

## SUPPLEMENTARY MATERIAL

Shreyas S. Athavale, Wei Ouyang, Mark P. McPike, Bruce S. Hudson and Philip N. Borer

Department of Chemistry

Syracuse University

Syracuse, NY 13244

### Caption for Figure S1.

Ideal titrations upon adding nucleic acid to protein “AddNA” at values of  $K_d$  indicated near each curve. The total RNA concentration,  $R_t$ , increases from left to right along horizontal axis;  $R_t/P_t$  is the mole ratio of total RNA over total protein (27, 32). The vertical axis gives the W37 fluorescence intensity relative to the initial intensity, and assumes zero fluorescence when the protein is fully saturated with RNA. Titrations were calculated for 1:1 complexes at constant  $P_t = 0.3 \mu\text{M}$ . Dashed straight lines show titrations of complexes in the limit where binding constants approach infinity ( $K_d \rightarrow 0$ ) for 1:1 ( $R_1P_1$ ) and 1:2 ( $R_1P_2$ ).

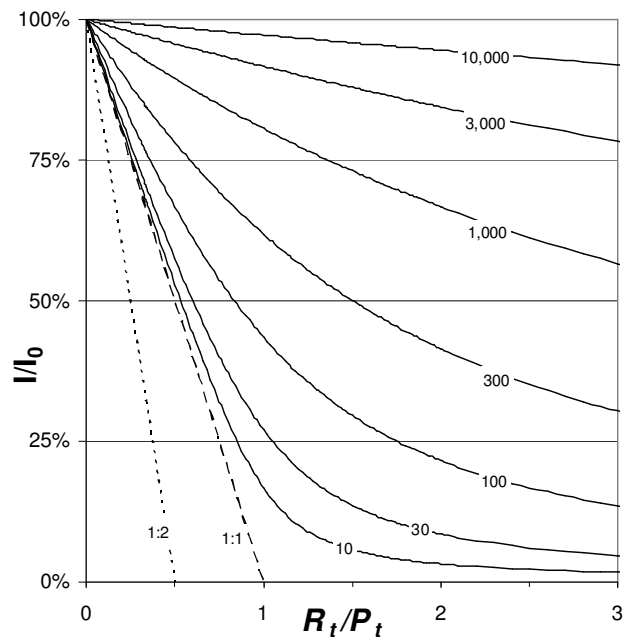

Figure S1.

### Caption for Figure S2.

Ideal titrations upon adding adding protein to nucleic acid “AddPro” at values of  $K_d$  indicated near each curve. Titrations were calculated for 1:1 complexes at constant  $R_t = 0.3 \mu\text{M}$ . They are plotted as relative W37 fluorescence intensity (arbitrary units) vs.  $P_t/R_t$ , with the protein concentration increasing left to right. The meaning of the 1:1 and 1:2 lines is the same as in Fig. S1. If  $P_t$  is increased in the absence of RNA, the intensity will follow the straight line for the “No Binding” limit ( $K_d^{-1} \rightarrow 0$ ).

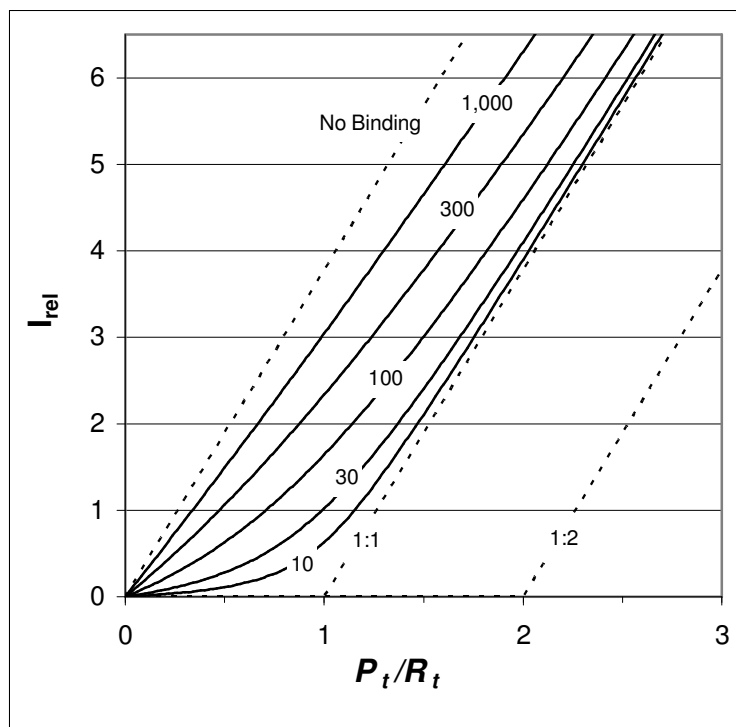

Figure S2.

### Caption for Figure S3.

AddNA assays at  $[\text{NaCl}] = 0.050 \text{ M}$  measured on different days as in Fig. 4 (main text). The limit lines are for  $R_1P_1$  (long dashes) and  $R_1P_2$  (short dashes; this line intersects the x-axis at the mole ratio,  $R_t/P_t = 1/2$ ). Solid diamonds show 0.200 M NaCl data identical to that in Fig. 4a (main text).

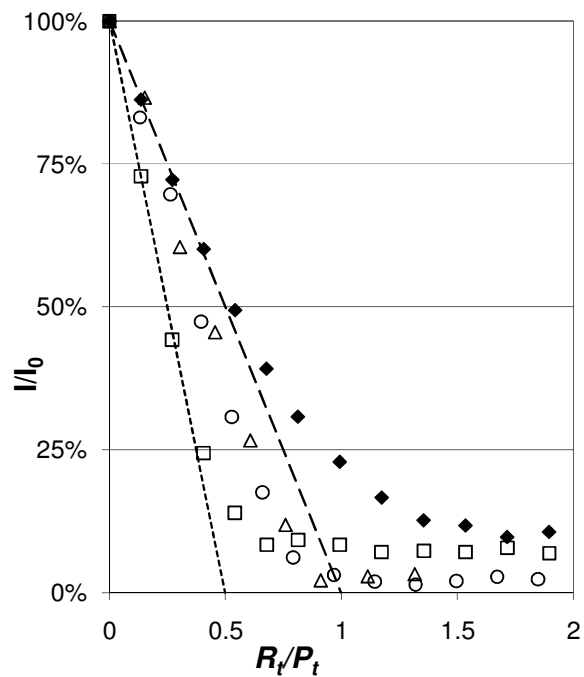

Figure S3

### Caption for Figure S4.

AddPro titrations at very low [NaCl]. Four data sets were measured at 0.01 M NaCl (open symbols) and at one at 0.025 M (closed triangles) on different days and with different protein preparations ( $R_t = 0.075 \mu\text{M}$ ). The solid limit line (marked 0:1) occurs when  $R_t = 0$  and  $P_t$  is increased. The best fit slope for each 0:1 line was determined by linear regression (setting the intercept = 0). All five data sets were normalized to the same slope for the 0:1 line and to assign relative fluorescence  $I_{\text{rel}} = 100$  for the data point with the highest intensity; the normalizing factor for a particular 0:1 data set was applied to the data with  $R_t = 0.075 \mu\text{M}$  data collected on the same day. The normalized data points for the 0:1 data are shown by small symbols that match those for the corresponding  $R_t = 0.075 \mu\text{M}$  data. The standard deviation from the normalized 0:1 line for the 60 data points with  $R_t = 0$  was 1.3 relative fluorescence units.

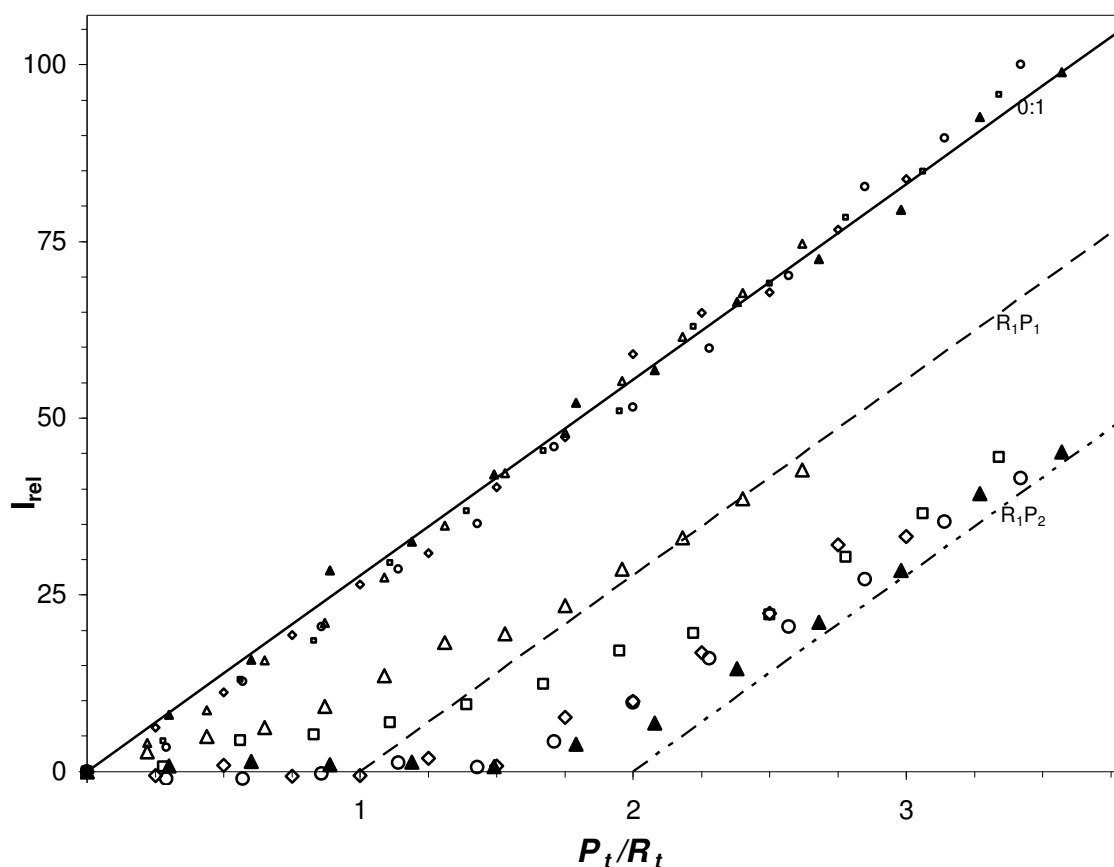

Figure S4.
